# Supplementary material for: Microbial iron uptake in the naturally fertilized waters in the vicinity of the Kerguelen Islands: phytoplankton–bacteria interactions
Source: Copernicus journal article supplement (doi:10.5194/bg-12-1893-2015), 2015-03-23
Supplement: Supplementary file 1 [file bg-12-1893-2015-supplement.zip]

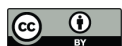

## *Supplement of*

# **Microbial iron uptake in the naturally fertilized waters in the vicinity of the Kerguelen Islands: phytoplankton–bacteria interactions**

**M. Fourquez et al.**

*Correspondence to:* M. Fourquez (marion.fourquez@utas.edu.au)

- [bg-12-1893-2015-supplement-cover-letter.pdf](#)
- [supplement](#)
  - [fourquez-supplementary-table.pdf](#)
  - [supplement-animation.mp4](#)
