# Supplementary material for: Microbial iron uptake in the naturally fertilized waters in the vicinity of the Kerguelen Islands: phytoplankton–bacteria interactions
Source: Copernicus journal article supplement (doi:10.5194/bg-12-1893-2015), 2015-03-23
Supplement: Supplementary file 2 [file bg-12-1893-2015-supplement.zip]

**Supplementary table.** Carbon biomass (particulate organic carbon, POC) and Fe uptake rates for pico-nanoplankton. Values are relative to incubations performed on seawater prefiltered on 25 µm mesh (microplankton was excluded).

| Station | PAR level | Carbon biomass (POC)*<br>(µmolC L <sup>-1</sup> ) | Fe uptake rate<br>(pmolFe L <sup>-1</sup> d <sup>-1</sup> ) |
|---------|-----------|---------------------------------------------------|-------------------------------------------------------------|
| E-4E    | 75%       | 11.99                                             | 14.33                                                       |
|         | 45%       |                                                   | 16.80                                                       |
|         | 25%       |                                                   | 12.83                                                       |
|         | 16%       |                                                   | 14.11                                                       |
|         | 4%        |                                                   | 15.53                                                       |
|         | 1%        |                                                   | 8.80                                                        |
| A3-2    | 75%       | 3.03                                              | 17.69                                                       |
|         | 45%       |                                                   | 14.33                                                       |
|         | 25%       |                                                   | 13.26                                                       |
|         | 16%       |                                                   | 22.89                                                       |
|         | 4%        |                                                   | 19.26                                                       |
|         | 1%        |                                                   | 21.33                                                       |
| E-5     | 75%       | 2.75                                              | 5.32                                                        |
|         | 45%       |                                                   | 5.40                                                        |
|         | 25%       |                                                   | 9.93                                                        |
|         | 16%       |                                                   | 9.14                                                        |
|         | 4%        |                                                   | 13.90                                                       |
|         | 1%        |                                                   | 10.67                                                       |
| R-2     | 75%       | 3.05                                              | 0.40                                                        |
|         | 45%       |                                                   | 0.44                                                        |
|         | 25%       |                                                   | 0.38                                                        |
|         | 16%       |                                                   | 0.35                                                        |
|         | 4%        |                                                   | 0.37                                                        |
|         | 1%        |                                                   | 0.44                                                        |
| E-2     | 75%       | 5.90                                              | 1.82                                                        |
|         | 45%       |                                                   | 1.80                                                        |
|         | 25%       |                                                   | 2.66                                                        |
|         | 16%       |                                                   | 10.42                                                       |
|         | 4%        |                                                   | 3.06                                                        |
|         | 1%        |                                                   | 0.78                                                        |
| E-3     | 75%       | 7.10                                              | 15.71                                                       |
|         | 45%       |                                                   | n.d                                                         |
|         | 25%       |                                                   | 17.76                                                       |
|         | 16%       |                                                   | 14.85                                                       |
|         | 4%        |                                                   | 27.17                                                       |
|         | 1%        |                                                   | 26.45                                                       |
| F-L     | 75%       | 9.82                                              | 50.02                                                       |
|         | 45%       |                                                   | 43.20                                                       |
|         | 25%       |                                                   | 61.33                                                       |
|         | 16%       |                                                   | 61.09                                                       |
|         | 4%        |                                                   | 56.18                                                       |
|         | 1%        |                                                   | 24.71                                                       |
| E-4W    | 75%       | 4.24                                              | 12.68                                                       |
|         | 45%       |                                                   | 9.40                                                        |
|         | 25%       |                                                   | 19.36                                                       |
|         | 16%       |                                                   | 15.11                                                       |
|         | 4%        |                                                   | 14.88                                                       |
|         | 1%        |                                                   | 17.50                                                       |

\* Carbon biomass for pico-nanoplankton was calculated from particulate organic carbon (POC) concentrations measured on surface seawater. We assumed the sum of the POC concentration on the 1 and 5 µm filters, corresponding to the 1-20 µm size-fraction, to be representative of this community.
